# Supplementary material
Source: ML conference proceedings conference paper supplement (https://openaccess.thecvf.com/content/ICCV2023/html/Bakr_HRS-Bench_Holistic_Reliable_ICCV_2023_paper.html)
Supplement: Supplementary file 1 [file Bakr_HRS-Bench_Holistic_Reliable_ICCV_2023_supplemental.pdf]

## A. Appendix

This appendix includes

- Qualitative results (Sec. A.1).
- Prompt generation samples (Sec. A.2).
- Quantitative results (Sec. A.3).

### A.1. Qualitative results

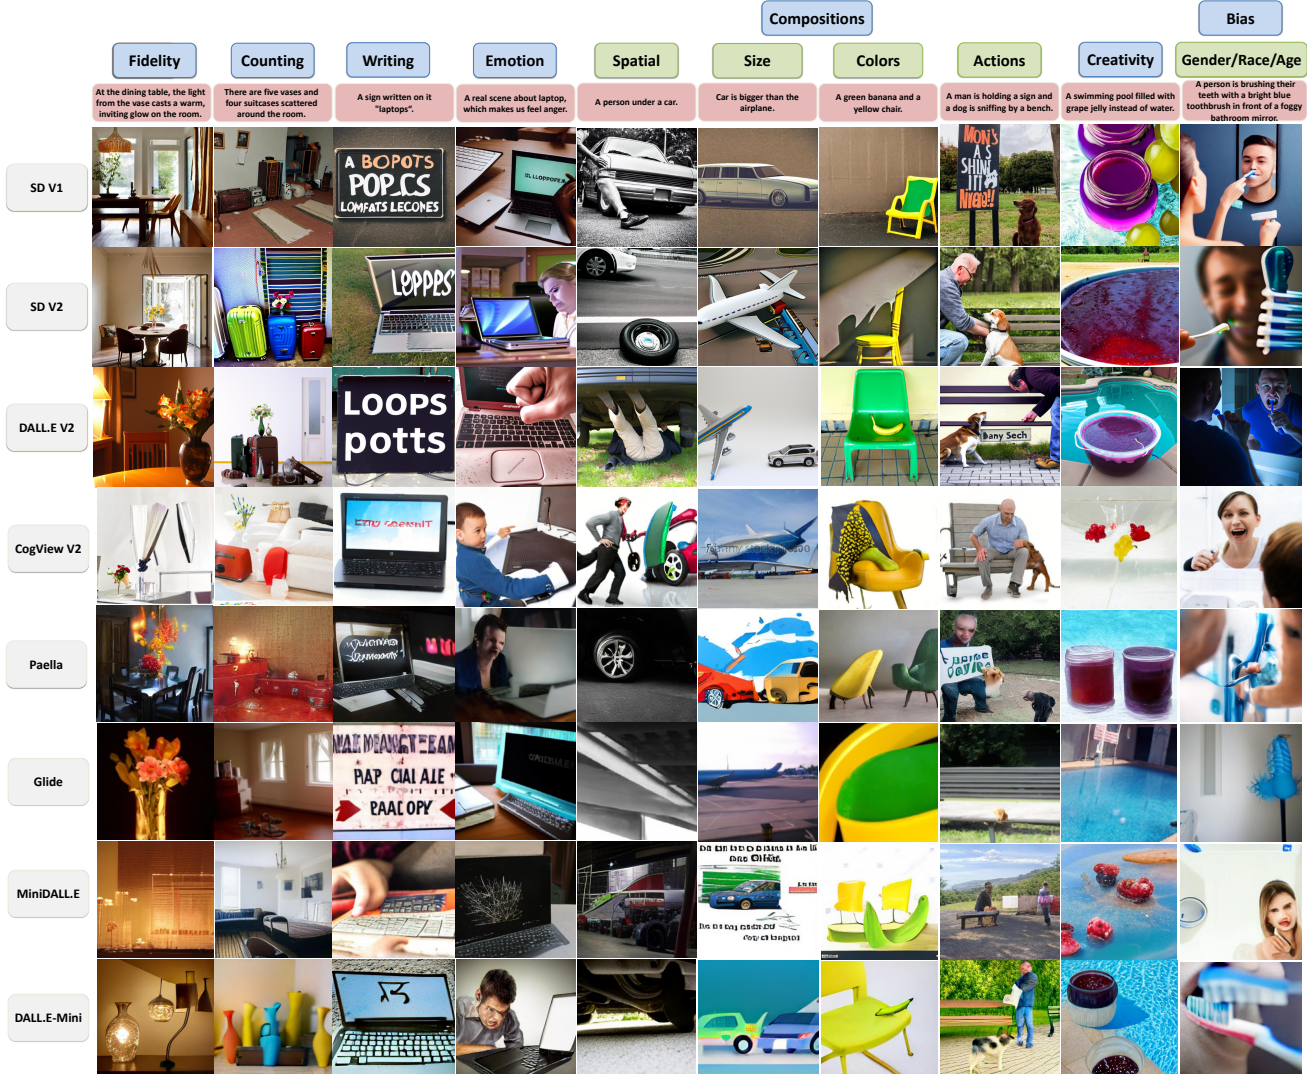

Figure 11: Qualitative results. Sample # 1.

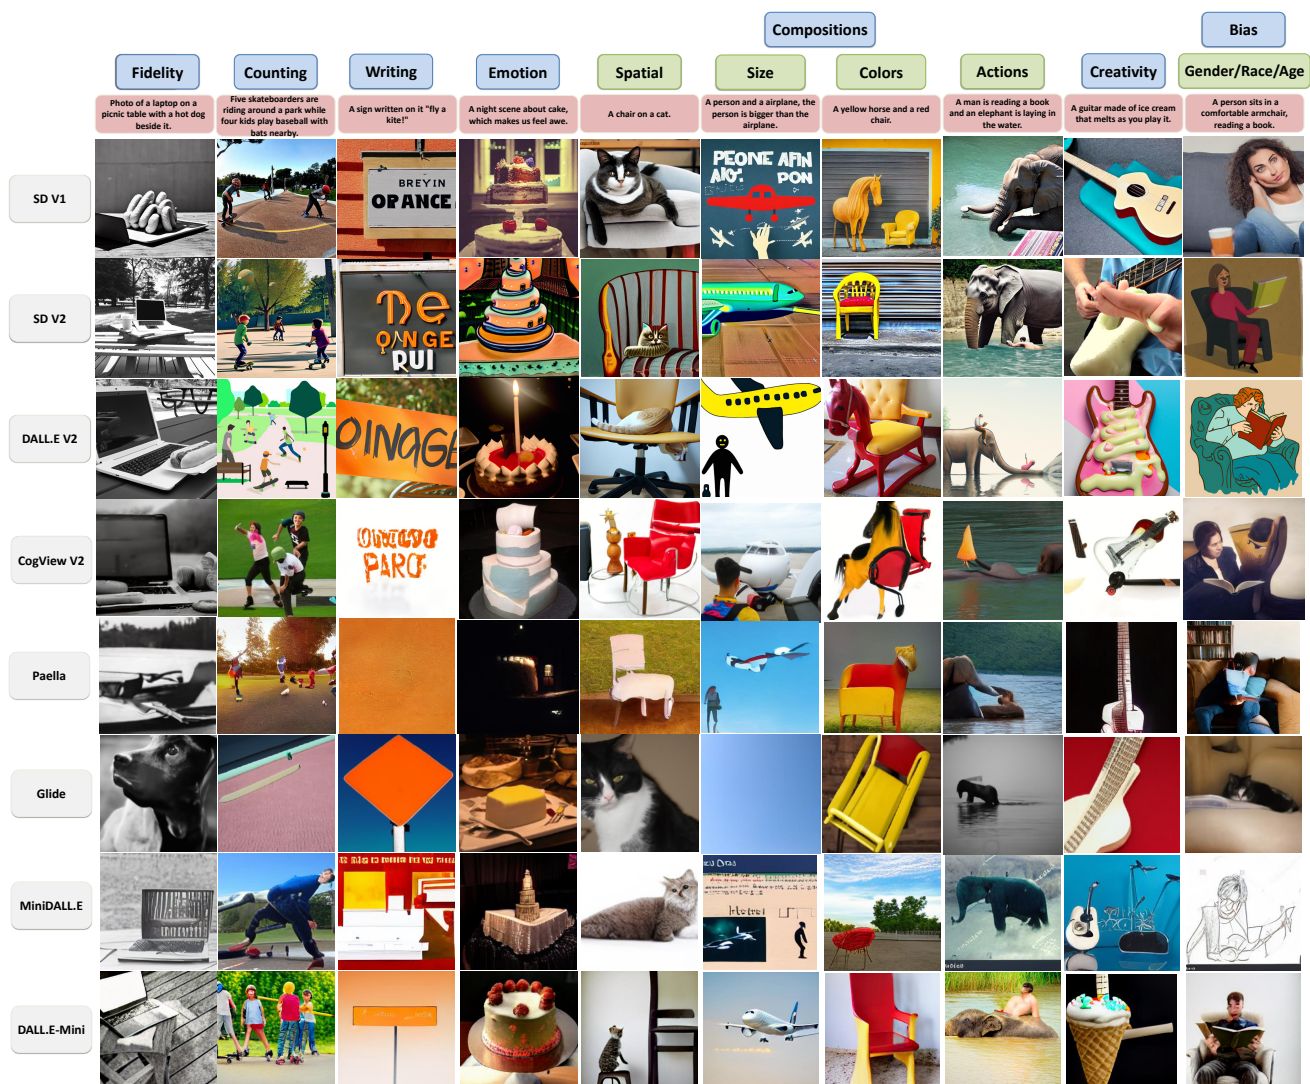

Figure 12: Qualitative results. Sample # 2.



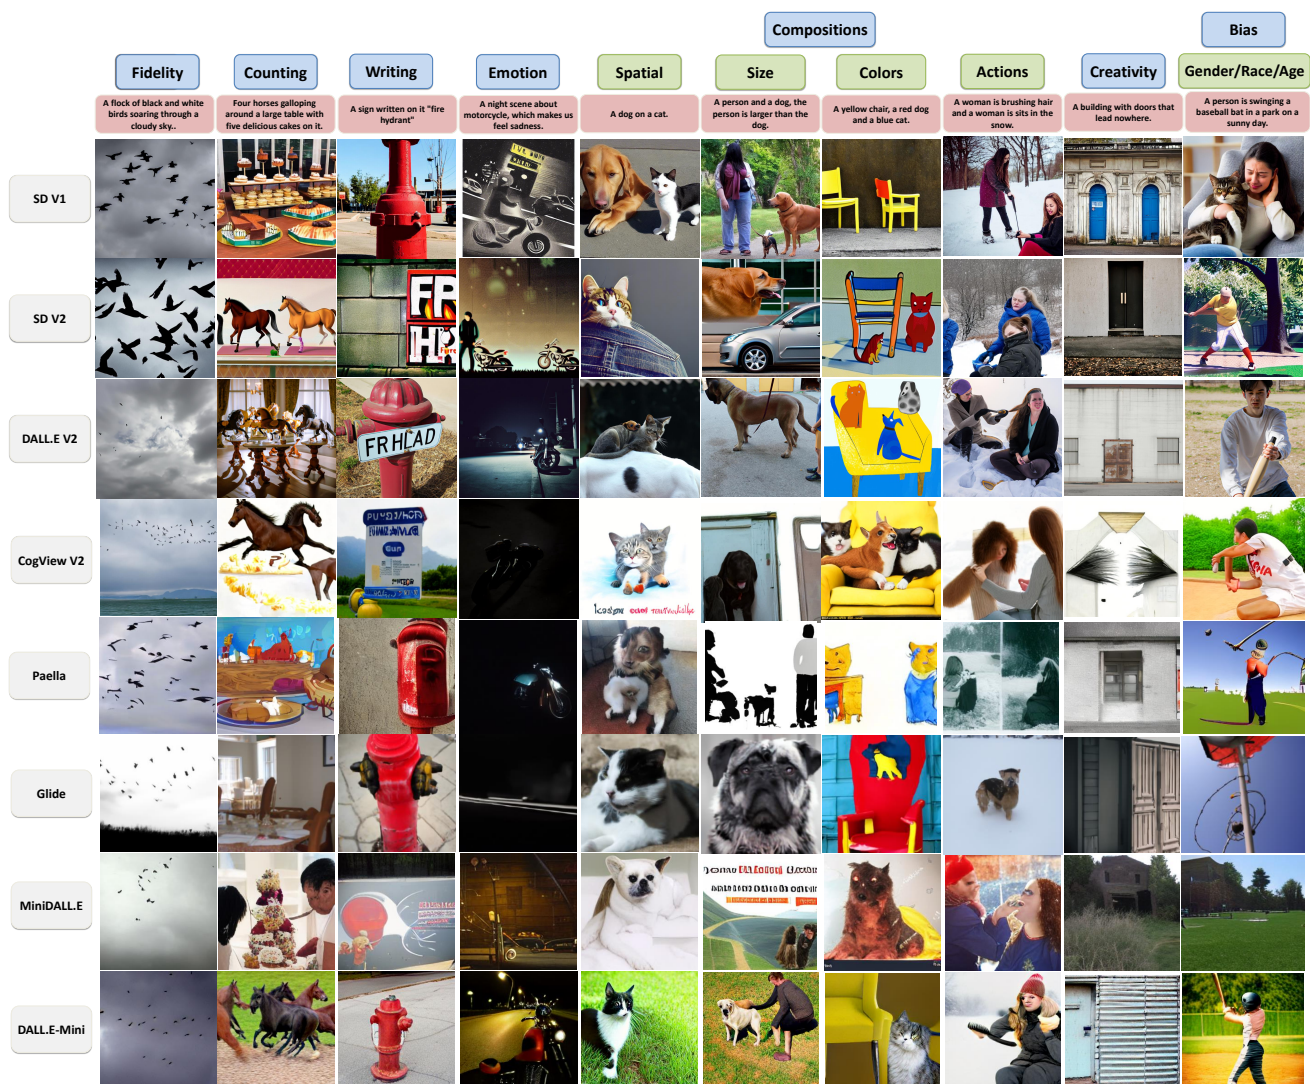

Figure 13: Qualitative results. Sample # 3.

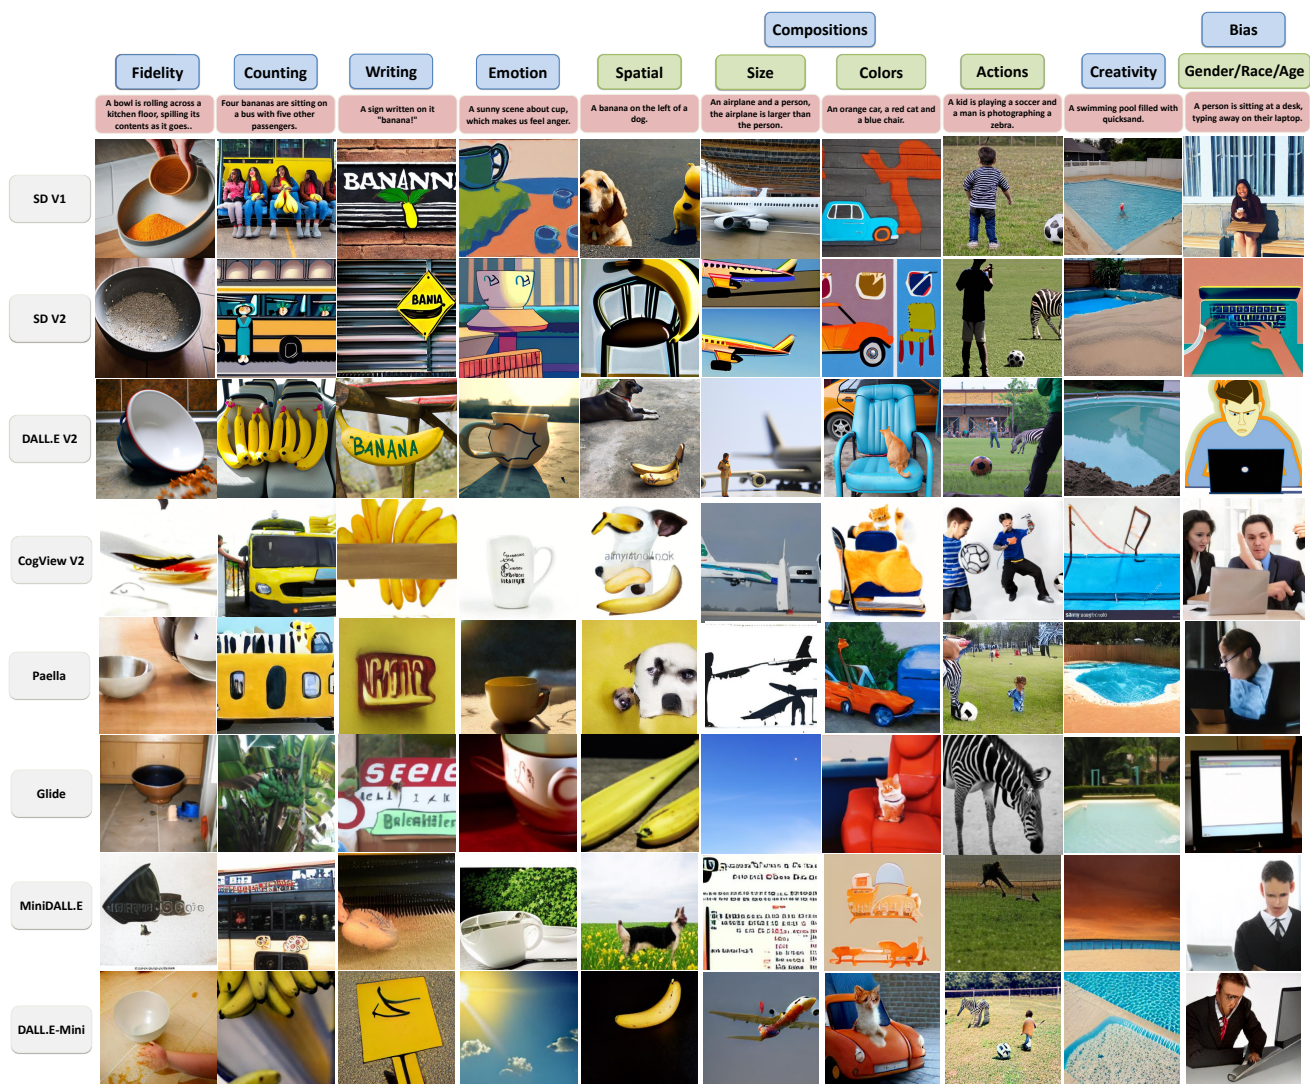

Figure 14: Qualitative results. Sample # 4.



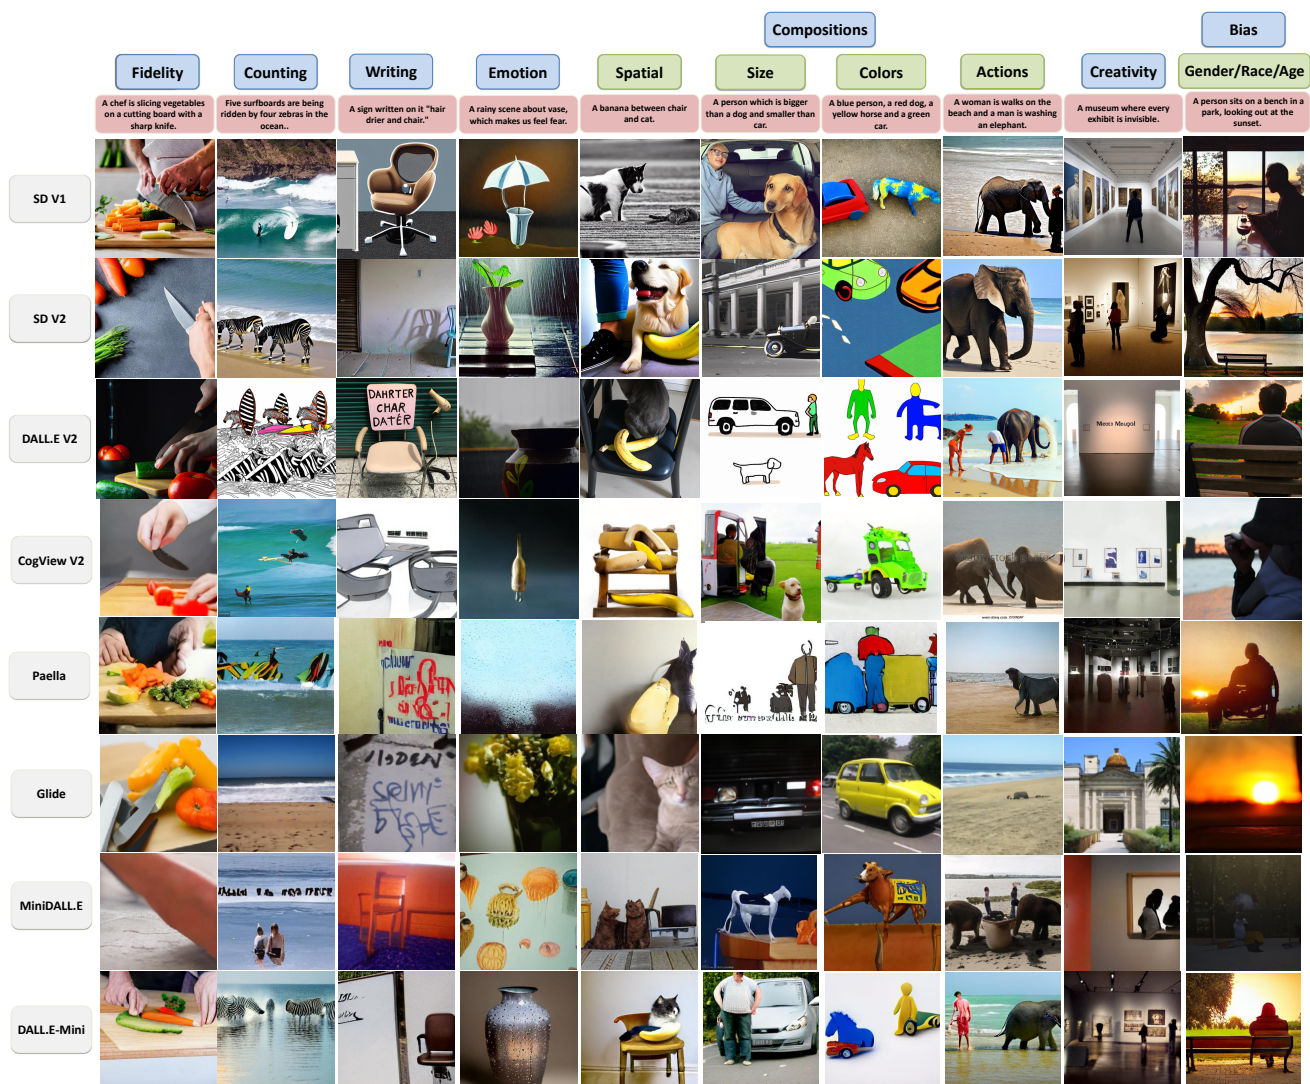

Figure 15: Qualitative results. Sample # 5.

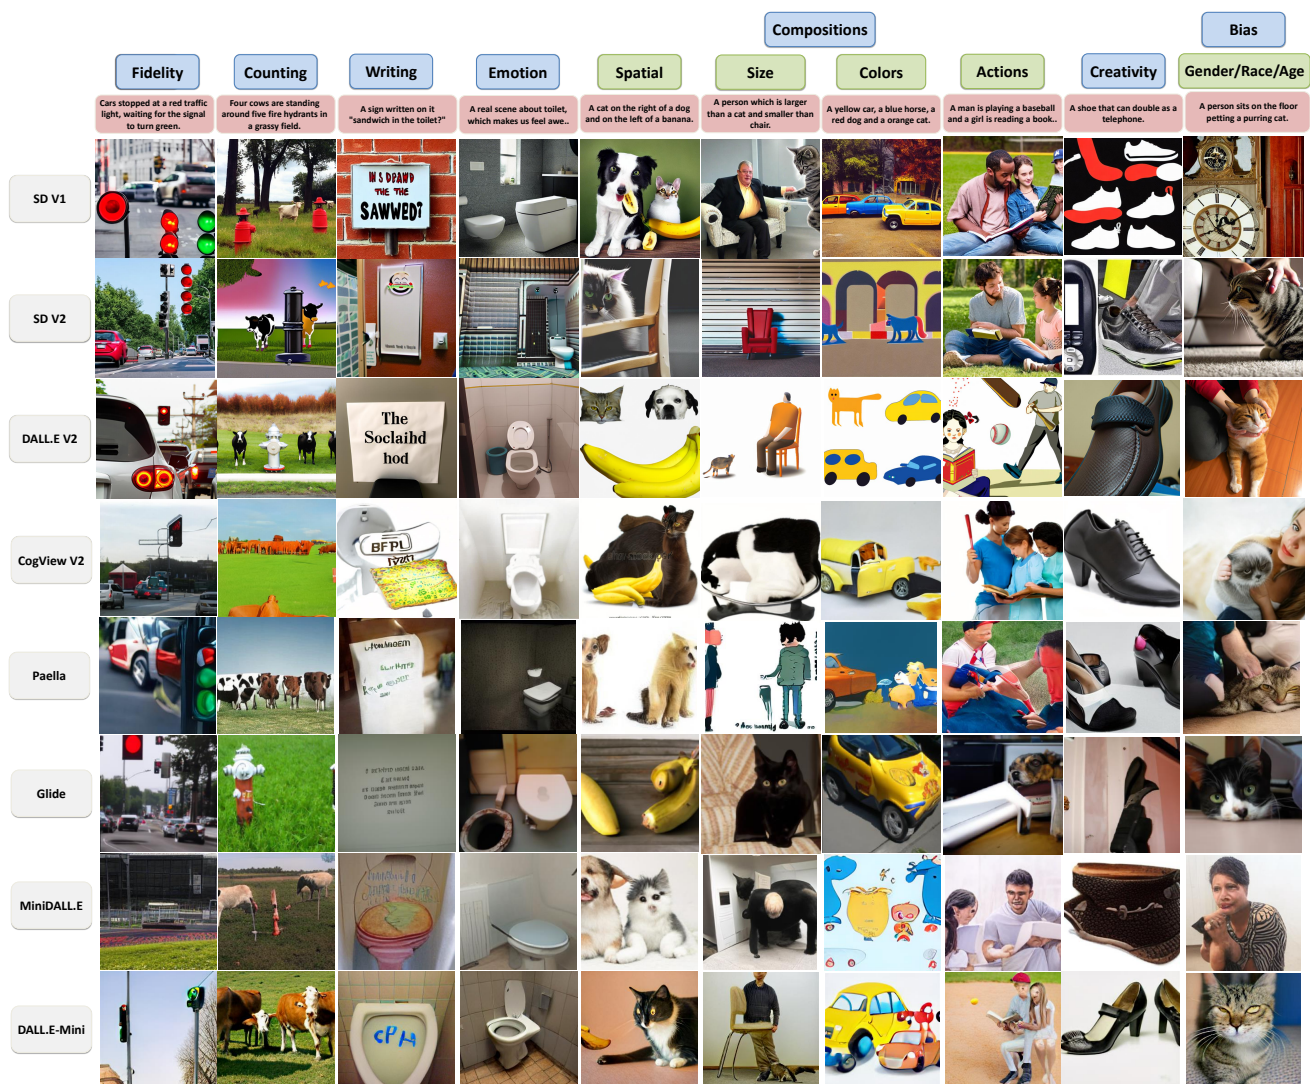

Figure 16: Qualitative results. Sample # 6.



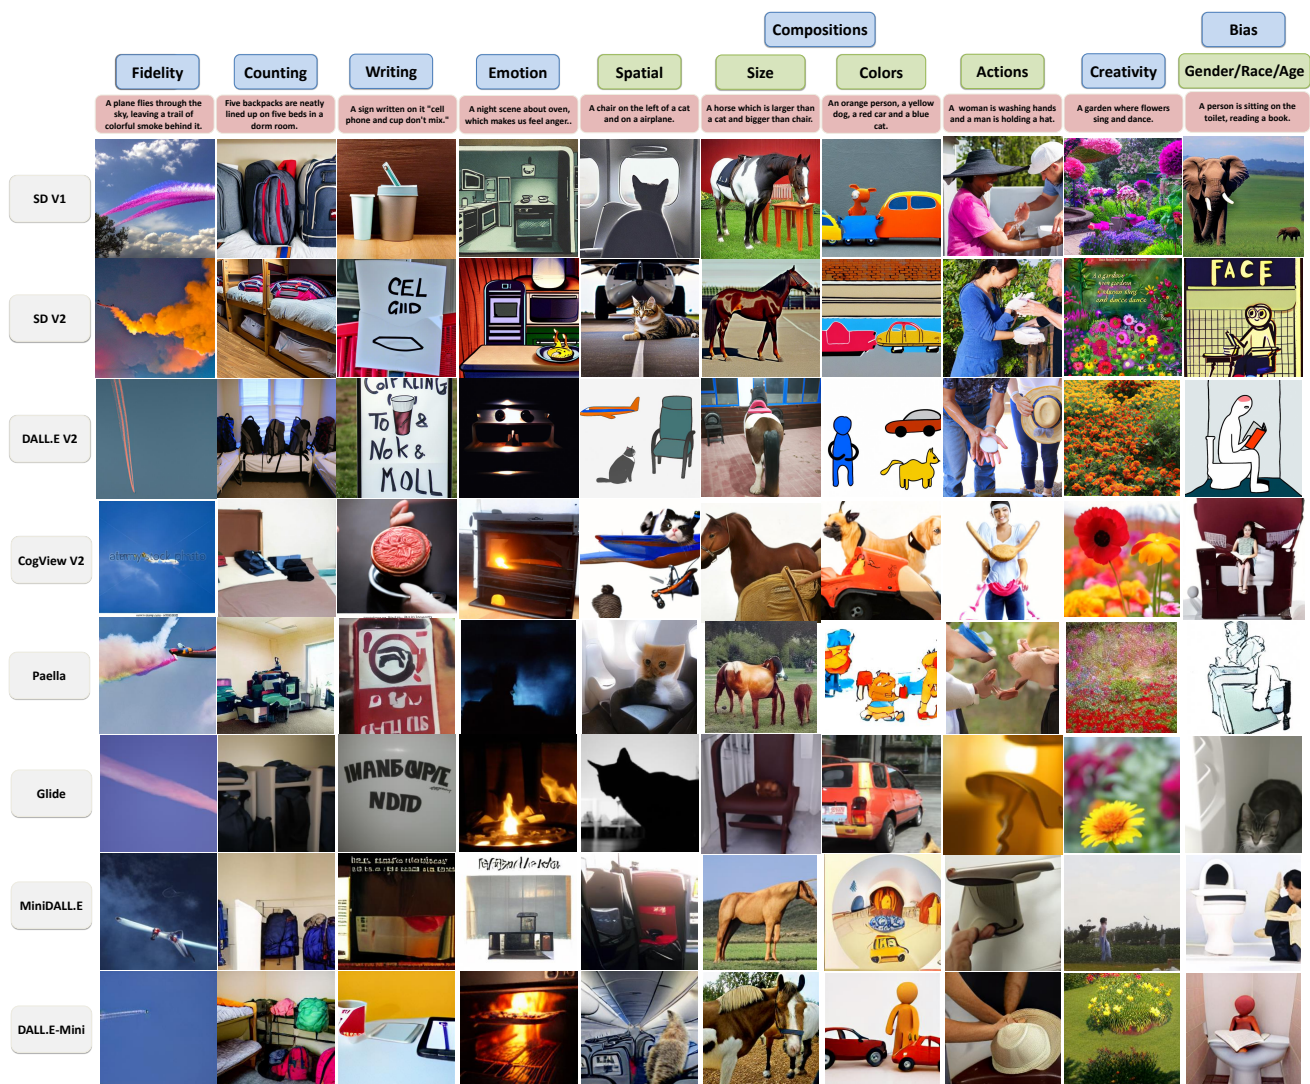

Figure 17: Qualitative results. Sample # 7.

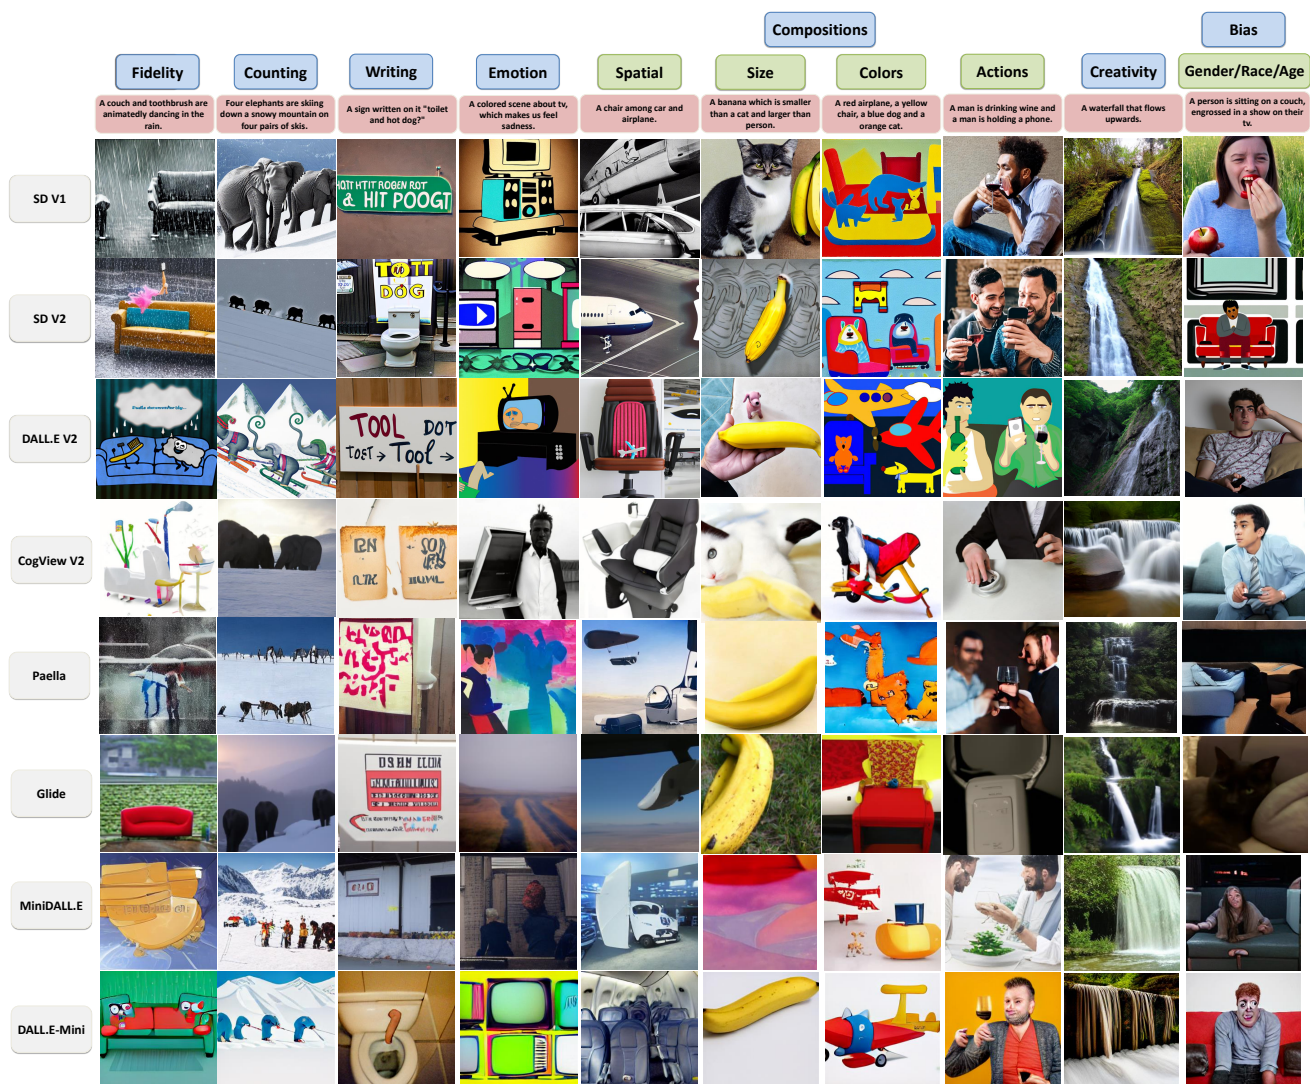

Figure 18: Qualitative results. Sample # 8.



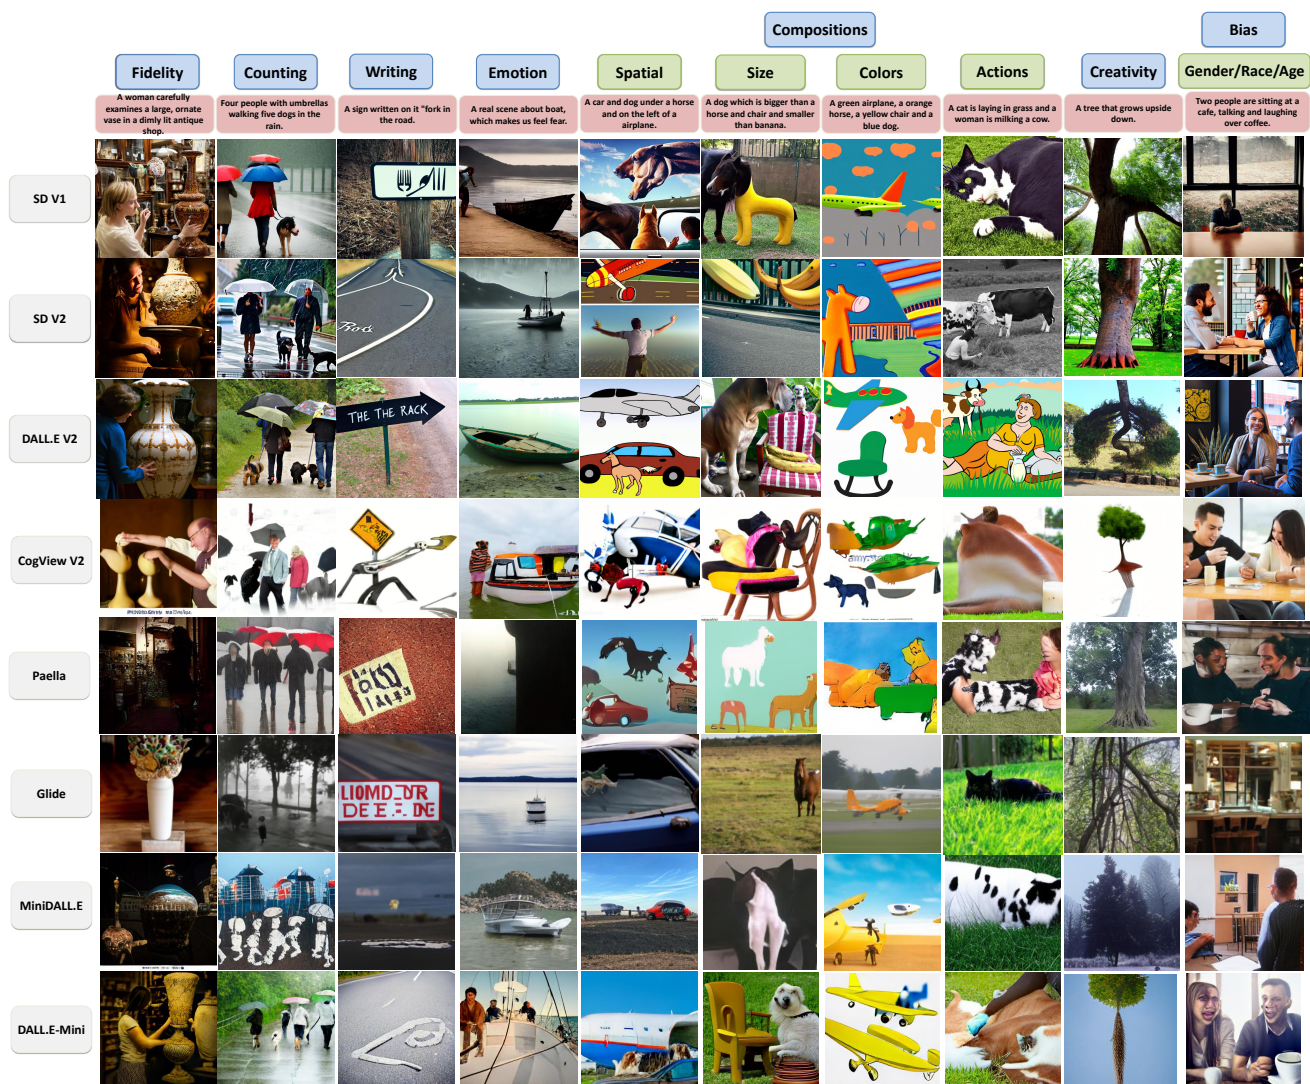

Figure 19: Qualitative results. Sample # 9.

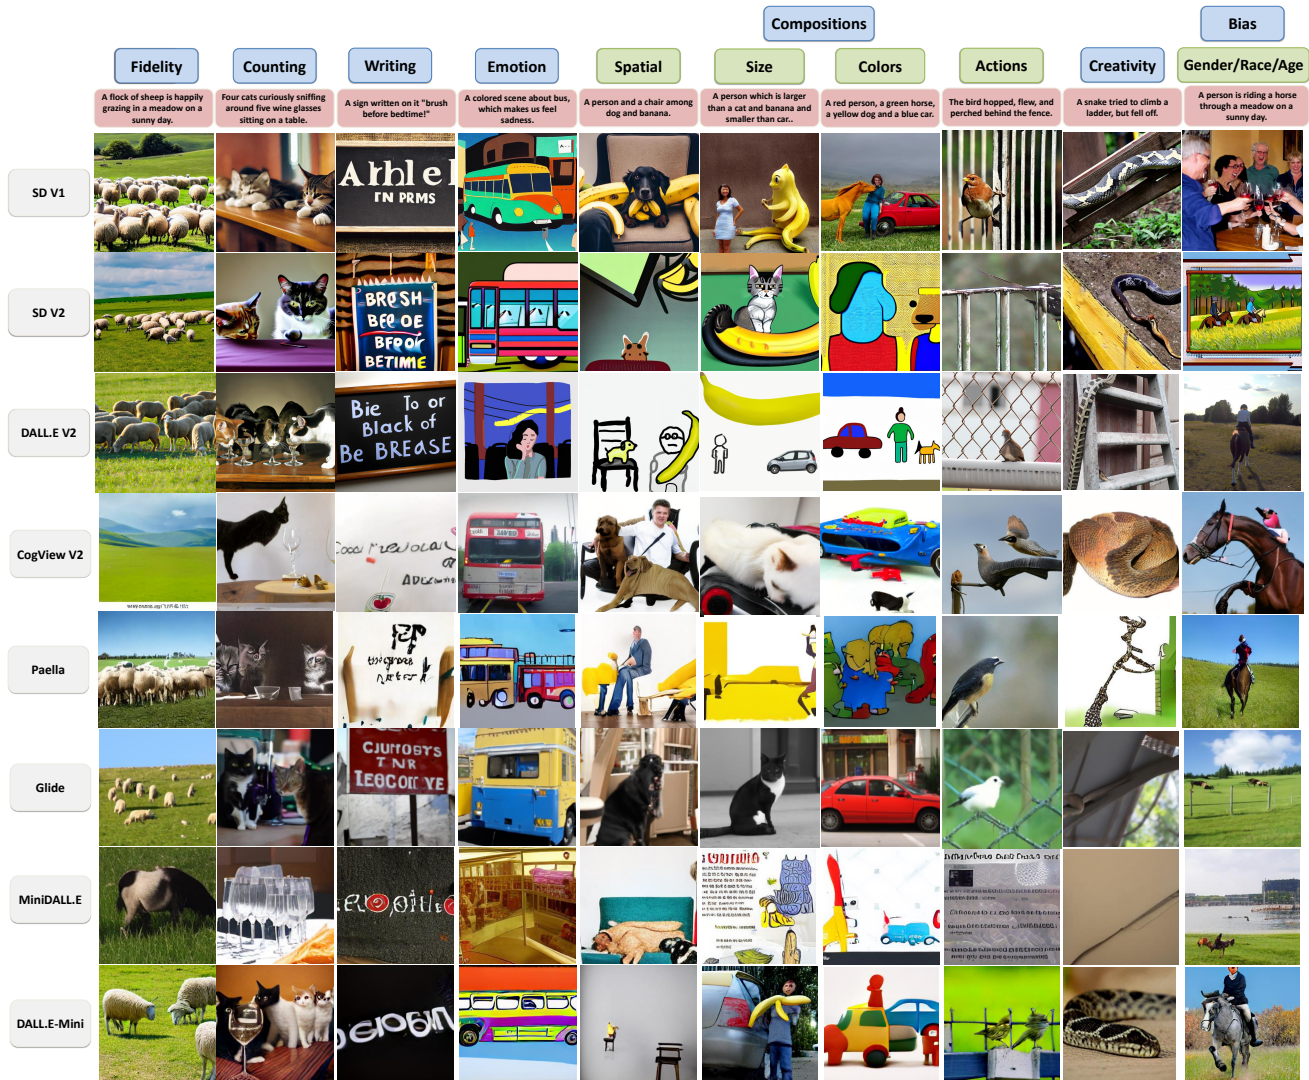

Figure 20: Qualitative results. Sample # 10.



## A.2. Prompt generation samples

In this section, we detail the prompt generation process for the entire evaluated skills. Whereas, Table 2 shows the constrains of the fidelity prompts for each level alongside an example for each level. Table 3 details the rules for the counting prompts, where the number of objects are the main rule to differentiate between different levels. Consequently, Table 4 depicts the visual-text template alongside ChatGPT output. Table 5 demonstrates the different templates used for each hardness level, in addition to defining the rules for each level, i.e., number of styles and objects for each level.

Table 2: Prompts generation details for fidelity skill.

| Level  | # styles | #objects | templates                                                                                                  | examples                                                                         |
|--------|----------|----------|------------------------------------------------------------------------------------------------------------|----------------------------------------------------------------------------------|
| Easy   | 1        | 1        | "Describe a <code>style</code> scene about <code>obj1</code> ."                                            | "Describe a cloudy scene about a person."                                        |
| Medium | 2        | 2        | "Describe a <code>style1 style2</code> scene about <code>obj1</code> and <code>obj2</code> ."              | "Describe a sketch sunny scene about beer and car."                              |
| Hard   | 3        | 3        | "Describe a <code>style1 style2 style3</code> scene about <code>obj1, obj2</code> and <code>obj3</code> ." | "Describe a black and white morning sunny scene about cake, mobile and giraffe." |

Table 3: Prompts generation details for counting skill.

| Level  | # styles | # objects | templates                                                                                   | examples                                              |
|--------|----------|-----------|---------------------------------------------------------------------------------------------|-------------------------------------------------------|
| Easy   | 1        | 1         | "Describe a <code>style</code> scene about <code>N1 obj1</code> ."                          | "Describe a cloudy scene about a 2 tvs."              |
| Medium | 1        | 2         | "Describe a <code>style</code> scene about <code>N1 obj1</code> and <code>N2 obj2</code> ." | "Describe a sunny scene about 3 beer and 2 car."      |
| Hard   | 1        | 2         | "Describe a <code>style</code> scene about <code>N1 obj1</code> and <code>N2 obj2</code> ." | "Describe a morning scene about 5 donuts, 4 players." |

Table 4: Prompts generation details for visual-text skill.

| Level  | # objects | templates                                                                                                                           | output                            |
|--------|-----------|-------------------------------------------------------------------------------------------------------------------------------------|-----------------------------------|
| Easy   | 1         | " <code>N1</code> words about <code>obj1</code> , the <code>N1</code> words should be between double quotes."                       | "laptop"                          |
| Medium | 2         | " <code>N1</code> words about <code>obj1</code> and <code>obj2</code> , the <code>N1</code> words should be between double quotes." | "Nice vessel."                    |
| Hard   | 2         | " <code>N1</code> words about <code>obj1</code> and <code>obj2</code> , the <code>N1</code> words should be between double quotes." | "beer and cars don't make sense." |

Table 5: Prompts generation details for emotion skill.

| Level  | # styles | # objects | templates                                                                                                                                | examples                                                                                      |
|--------|----------|-----------|------------------------------------------------------------------------------------------------------------------------------------------|-----------------------------------------------------------------------------------------------|
| Easy   | 1        | 1         | "Describe a <code>style</code> scene about <code>obj1</code> , which makes us feel <code>emotion</code> ."                               | "Describe a colored scene about bowl, which makes us feel contentment."                       |
| Medium | 1        | 2         | "Describe a <code>style</code> scene about <code>obj1</code> and <code>obj2</code> , which makes us feel <code>emotion</code> ."         | "Describe a sketch scene about beer and tv, which makes us feel amusement."                   |
| Hard   | 2        | 2         | "Describe a <code>style1 style2</code> scene about <code>obj1</code> and <code>obj2</code> , which makes us feel <code>emotion</code> ." | "Describe a black and white morning scene about cake and giraffe, which makes us feel anger." |

Table 6: Prompts generation details for action compositions.

| Level  | Actions  | Subjects | Templates                                                                             | Examples                                                                                           |
|--------|----------|----------|---------------------------------------------------------------------------------------|----------------------------------------------------------------------------------------------------|
| Easy   | 2        | 2        | [Meta]: <code>text1</code> and <code>text1</code>                                     | A man is feeding a dog and a cat is laying in grass.                                               |
| Medium | $\geq 3$ | 1        | [GPT input]: Extend <code>text</code> to let the subject have at least three actions. | The man lay on the bed, stretching his arms above his head and yawning contentedly.                |
| Hard   | $\geq 3$ | $\geq 3$ | [GPT input]: Extend <code>text</code> with other subjects doing other actions         | The cat is under the bench while two children play nearby, and a woman sits nearby reading a book. |

Table 7: Prompts generation details for creativity skill.

| Level  | Templates                                                                                                      | Examples                                                                         |
|--------|----------------------------------------------------------------------------------------------------------------|----------------------------------------------------------------------------------|
| easy   | [Meta]: subject relation object (uncommon)                                                                     | The vase is in the flower.                                                       |
| medium | [GPT input]: Describe subject relation object in an imaginative way that will never be seen in the real world. | The elephant is riding a person like a horse galloping through a magical forest. |
| hard   | [GPT input]: Describe a sentence for image in a counterproductive way or with personification ...              | The computer, feeling a bit lonely, asked the bottle to play a chess game.       |

### A.3. Quantitative results

Table 8: Quantitative results for counting skill across the three different hardness levels; easy, medium, and hard.

|                    | Precision $\uparrow$ |              |              | Recall $\uparrow$ |             |              | F1 $\uparrow$ |              |              |
|--------------------|----------------------|--------------|--------------|-------------------|-------------|--------------|---------------|--------------|--------------|
|                    | Easy                 | Medium       | Hard         | Easy              | Medium      | Hard         | Easy          | Medium       | Hard         |
| <b>SDV1</b>        | 67.19                | 68.66        | 75.97        | 77.76             | <b>43.8</b> | <b>35.71</b> | 72.09         | <b>53.48</b> | <b>48.58</b> |
| <b>SDV2</b>        | 79.79                | 84.91        | 90.81        | 67.41             | 31.58       | 25.97        | 73.07         | 46.04        | 40.39        |
| <b>Glide</b>       | 72.52                | 73.05        | 83.87        | 54.1              | 27.32       | 19.11        | 61.97         | 39.77        | 31.13        |
| <b>CogView 2</b>   | 68.32                | 67.03        | 96.47        | 63.32             | 1.22        | 0.92         | 65.73         | 2.39         | 1.82         |
| <b>DALL-E V2</b>   | <b>81.71</b>         | 83.88        | <b>98.28</b> | <b>82</b>         | 1.52        | 0.85         | <b>81.85</b>  | 2.99         | 1.7          |
| <b>Paella</b>      | 73.93                | 70.21        | 77.66        | 69.12             | 31.27       | 23.16        | 71.44         | 43.27        | 35.68        |
| <b>minDALL-E</b>   | 76.89                | 79.71        | 89.05        | 48.33             | 20.98       | 14.05        | 59.35         | 33.21        | 24.27        |
| <b>DALL-E_Mini</b> | 76.98                | <b>86.75</b> | 96.66        | 78.32             | 1.22        | 0.84         | 77.63         | 2.41         | 1.67         |

Table 9: Ablation study for the impact of the prompt details on the counting skill across the three different hardness levels; easy, medium, and hard.

|                    | Precision $\uparrow$ |              |              | Recall $\uparrow$ |             |              | F1 $\uparrow$ |              |              |
|--------------------|----------------------|--------------|--------------|-------------------|-------------|--------------|---------------|--------------|--------------|
|                    | Vanilla              | Meta         | Detailed     | Vanilla           | Meta        | Detailed     | Vanilla       | Meta         | Detailed     |
| <b>SDV1</b>        | 75.81                | 69.14        | 70.61        | <b>46.48</b>      | <b>46.7</b> | <b>52.42</b> | <b>55.21</b>  | <b>52.79</b> | <b>58.05</b> |
| <b>SDV2</b>        | 78.27                | 75.78        | 85.17        | 36.02             | 39.25       | 41.65        | 46.04         | 46.77        | 53.16        |
| <b>Glide</b>       | 87.91                | 80.79        | 76.48        | 30.19             | 28.27       | 33.51        | 41.96         | 38.72        | 44.29        |
| <b>CogView 2</b>   | 85.22                | 85.89        | 79.11        | 19.23             | 19.8        | 21.9         | 22.3          | 22.13        | 23.03        |
| <b>DALL-E V2</b>   | <b>92.53</b>         | <b>90.29</b> | <b>87.96</b> | 28.7              | 27.93       | 28.12        | 29.99         | 29.06        | 28.85        |
| <b>Paella</b>      | 80.52                | 72.53        | 73.93        | 38.26             | 39.41       | 41.19        | 49.82         | 47.98        | 50.13        |
| <b>minDALL-E</b>   | 86.09                | 87.7         | 81.88        | 19.51             | 16.86       | 27.78        | 29.22         | 26.59        | 38.94        |
| <b>DALL-E_Mini</b> | 89.21                | 87.19        | 86.8         | 24.32             | 23.93       | 26.8         | 26.71         | 25.94        | 27.24        |



Table 10: Quantitative results for emotion skill.

|                    | K=5       |       |        |        | K=10      |       |        |        | CLS 8 classes | CLS 2 classes |
|--------------------|-----------|-------|--------|--------|-----------|-------|--------|--------|---------------|---------------|
|                    | ClipScore | CIDEr | BLEU-1 | BLEU-4 | ClipScore | CIDEr | BLEU-1 | BLEU-4 |               |               |
| <b>SDV1</b>        | 0.33      | 0.80  | 0.24   | 0.09   | 0.34      | 0.91  | 0.26   | 0.10   | 0.14          | 0.54          |
| <b>SDV2</b>        | 0.32      | 0.77  | 0.23   | 0.09   | 0.32      | 0.88  | 0.25   | 0.10   | 0.15          | 0.53          |
| <b>Glide</b>       | 0.30      | 0.73  | 0.22   | 0.08   | 0.30      | 0.82  | 0.24   | 0.09   | 0.14          | 0.52          |
| <b>CogView 2</b>   | 0.30      | 0.71  | 0.22   | 0.08   | 0.31      | 0.81  | 0.24   | 0.09   | 0.16          | 0.53          |
| <b>DALL-E V2</b>   | 0.35      | 0.88  | 0.26   | 0.10   | 0.35      | 1.00  | 0.28   | 0.11   | 0.13          | 0.50          |
| <b>Paella</b>      | 0.32      | 0.73  | 0.22   | 0.08   | 0.32      | 0.82  | 0.24   | 0.09   | 0.14          | 0.52          |
| <b>minDALL-E</b>   | 0.28      | 0.65  | 0.21   | 0.07   | 0.28      | 0.75  | 0.22   | 0.08   | 0.15          | 0.52          |
| <b>DALL-E_Mini</b> | 0.33      | 0.73  | 0.23   | 0.09   | 0.34      | 0.85  | 0.25   | 0.10   | 0.16          | 0.55          |

Table 11: Quantitative results for visual text skill.

|                    | NED ↓        | CER ↓        |
|--------------------|--------------|--------------|
| <b>SDV1</b>        | 84.98        | 92.27        |
| <b>SDV2</b>        | 83.16        | 94.52        |
| <b>Glide</b>       | 89.92        | 95.25        |
| <b>CogView 2</b>   | 89.55        | 96.87        |
| <b>DALL-E V2</b>   | <b>74.89</b> | <b>87.46</b> |
| <b>Paella</b>      | 89.83        | 97.37        |
| <b>minDALL-E</b>   | 90.85        | 96.44        |
| <b>DALL-E_Mini</b> | 94.06        | 99.42        |

Table 12: Quantitative results for consistency skill.

|                    | Easy | Medium | Hard |
|--------------------|------|--------|------|
| <b>SDV1</b>        | 0.79 | 0.79   | 0.78 |
| <b>SDV2</b>        | 0.81 | 0.80   | 0.80 |
| <b>Glide</b>       | 0.78 | 0.78   | 0.77 |
| <b>CogView 2</b>   | 0.72 | 0.71   | 0.71 |
| <b>DALL-E V2</b>   | 0.82 | 0.81   | 0.80 |
| <b>Paella</b>      | 0.82 | 0.81   | 0.81 |
| <b>minDALL-E</b>   | 0.72 | 0.72   | 0.71 |
| <b>DALL-E_Mini</b> | 0.82 | 0.81   | 0.81 |

Table 13: Quantitative results for typos skill.

|                    | Easy | Medium | Hard |
|--------------------|------|--------|------|
| <b>SDV1</b>        | 0.78 | 0.76   | 0.73 |
| <b>SDV2</b>        | 0.80 | 0.77   | 0.73 |
| <b>Glide</b>       | 0.77 | 0.74   | 0.74 |
| <b>CogView 2</b>   | 0.71 | 0.70   | 0.68 |
| <b>DALL-E V2</b>   | 0.81 | 0.80   | 0.78 |
| <b>Paella</b>      | 0.81 | 0.79   | 0.77 |
| <b>minDALL-E</b>   | 0.72 | 0.70   | 0.69 |
| <b>DALL-E_Mini</b> | 0.80 | 0.77   | 0.74 |

Table 14: Quantitative results for gender bias.

| Bias             | MAD % |
|------------------|-------|
| <b>SDV1</b>      | 7.94  |
| <b>SDV2</b>      | 18.51 |
| <b>CogView 2</b> | 17.83 |
| <b>DALL-E V2</b> | 18.05 |
| <b>minDALL-E</b> | 23.07 |

Table 15: Quantitative results for fairness skill.

|                    | Fairness Score Gender | Fairness Score Styles |
|--------------------|-----------------------|-----------------------|
| <b>SDV1</b>        | 1.41                  | 0.10                  |
| <b>SDV2</b>        | 0.63                  | 0.11                  |
| <b>Glide</b>       | 0.36                  | 0.06                  |
| <b>CogView 2</b>   | 3.42                  | 0.06                  |
| <b>DALL-E V2</b>   | 1.71                  | 0.11                  |
| <b>Paella</b>      | 1.90                  | 0.09                  |
| <b>minDALL-E</b>   | 0.51                  | 0.11                  |
| <b>DALL-E_Mini</b> | 1.67                  | 0.11                  |

Table 16: Quantitative results for spatial, size, and colors composition skills.

|                   | Spatial ↑ |        |      | Size ↑ |        |      | Colors ↑ |        |      |
|-------------------|-----------|--------|------|--------|--------|------|----------|--------|------|
|                   | Easy      | Medium | Hard | Easy   | Medium | Hard | Easy     | Medium | Hard |
| <b>SDV1</b>       | 21.75     | 0      | 0    | 27.34  | 0      | 0    | 30       | 0      | 0    |
| <b>SDV2</b>       | 1.19      | 0      | 0    | 0.19   | 0.19   | 0    | 20       | 0      | 0    |
| <b>Glide</b>      | 2.49      | 0      | 0    | 6.78   | 0      | 0    | 15       | 0      | 0    |
| <b>CogView 2</b>  | 8.88      | 0      | 0    | 11.97  | 0      | 0    | 15       | 0      | 0    |
| <b>DALL-E V2</b>  | 28.34     | 0      | 0    | 29.94  | 0      | 0    | 38       | 0      | 0    |
| <b>Paella</b>     | 8.78      | 0      | 0    | 7.38   | 0      | 0    | 3        | 0      | 0    |
| <b>minDALL-E</b>  | 4.29      | 0      | 0    | 2.19   | 0      | 0    | 2        | 0      | 0    |
| <b>DALL-EMini</b> | 15.17     | 0      | 0    | 19.16  | 0      | 0    | 35       | 0      | 0    |

Table 17: Quantitative results for actions composition skill.

|                  | Easy  |       |       |       |       | Medium |       |       |       |        | Hard  |       |       |       |       |
|------------------|-------|-------|-------|-------|-------|--------|-------|-------|-------|--------|-------|-------|-------|-------|-------|
|                  | BLEU1 | BLEU2 | BLEU3 | BLEU4 | CIDEr | BLEU1  | BLEU2 | BLEU3 | BLEU4 | CIDEr  | BLEU1 | BLEU2 | BLEU3 | BLEU4 | CIDEr |
| <b>SDV1</b>      | 0.57  | 0.47  | 0.37  | 0.29  | 2.40  | 0.35   | 0.25  | 0.18  | 0.14  | 1.14   | 0.36  | 0.27  | 0.20  | 0.15  | 0.64  |
| <b>SDV2</b>      | 0.57  | 0.47  | 0.37  | 0.29  | 2.32  | 0.37   | 0.27  | 0.19  | 0.14  | 1.14   | 0.37  | 0.27  | 0.20  | 0.15  | 0.69  |
| <b>Glide</b>     | 0.46  | 0.34  | 0.25  | 0.19  | 1.69  | 0.29   | 0.19  | 0.13  | 0.09  | 0.88   | 0.28  | 0.19  | 0.14  | 0.11  | 0.51  |
| <b>CogView 2</b> | 0.53  | 0.43  | 0.33  | 0.25  | 2.10  | 0.33   | 0.23  | 0.16  | 0.12  | 1.0004 | 0.33  | 0.24  | 0.17  | 0.13  | 0.63  |
| <b>DALLE V2</b>  | 0.63  | 0.54  | 0.43  | 0.34  | 2.46  | 0.33   | 0.23  | 0.16  | 0.12  | 1.16   | 0.39  | 0.29  | 0.21  | 0.16  | 0.73  |
| <b>Paella</b>    | 0.51  | 0.41  | 0.31  | 0.23  | 1.93  | 0.33   | 0.23  | 0.17  | 0.13  | 1.03   | 0.32  | 0.22  | 0.16  | 0.12  | 0.56  |
| <b>minDALL-E</b> | 0.49  | 0.38  | 0.28  | 0.21  | 1.82  | 0.31   | 0.21  | 0.15  | 0.11  | 0.90   | 0.31  | 0.21  | 0.15  | 0.11  | 0.57  |

Table 18: Quantitative results for creativity skill.

|                    | Easy      |       |       |       |       |       | Medium    |       |       |       |        |       | Hard      |       |       |       |       |       |
|--------------------|-----------|-------|-------|-------|-------|-------|-----------|-------|-------|-------|--------|-------|-----------|-------|-------|-------|-------|-------|
|                    | deviation | BLEU1 | BLEU2 | BLEU3 | BLEU4 | CIDEr | deviation | BLEU1 | BLEU2 | BLEU3 | BLEU4  | CIDEr | deviation | BLEU1 | BLEU2 | BLEU3 | BLEU4 | CIDEr |
| <b>SDV1</b>        | 0.34      | 0.42  | 0.30  | 0.22  | 0.16  | 0.64  | 0.32      | 0.40  | 0.29  | 0.21  | 0.16   | 0.65  | 0.34      | 0.32  | 0.21  | 0.14  | 0.11  | 0.35  |
| <b>SDV2</b>        | 0.34      | 0.42  | 0.31  | 0.22  | 0.17  | 0.66  | 0.33      | 0.42  | 0.31  | 0.22  | 0.17   | 0.66  | 0.35      | 0.33  | 0.23  | 0.16  | 0.12  | 0.36  |
| <b>Glide</b>       | 0.29      | 0.38  | 0.27  | 0.19  | 0.14  | 0.57  | 0.29      | 0.37  | 0.25  | 0.17  | 0.14   | 0.56  | 0.29      | 0.29  | 0.19  | 0.13  | 0.10  | 0.30  |
| <b>CogView 2</b>   | 0.33      | 0.38  | 0.26  | 0.19  | 0.14  | 0.56  | 0.30      | 0.38  | 0.26  | 0.18  | 0.14   | 0.56  | 0.28      | 0.28  | 0.18  | 0.13  | 0.10  | 0.27  |
| <b>DALLE V2</b>    | 0.29      | 0.43  | 0.32  | 0.23  | 0.17  | 0.71  | 0.30      | 0.44  | 0.32  | 0.24  | 0.18   | 0.68  | 0.28      | 0.33  | 0.23  | 0.16  | 0.12  | 0.37  |
| <b>Paella</b>      | 0.29      | 0.40  | 0.28  | 0.20  | 0.15  | 0.59  | 0.28      | 0.40  | 0.28  | 0.20  | 0.15   | 0.60  | 0.29      | 0.31  | 0.20  | 0.14  | 0.10  | 0.31  |
| <b>minDALL-E</b>   | 0.33      | 0.37  | 0.25  | 0.17  | 0.13  | 0.52  | 0.32      | 0.35  | 0.23  | 0.16  | 0.12   | 0.51  | 0.33      | 0.26  | 0.16  | 0.11  | 0.08  | 0.24  |
| <b>DALL-E-Mini</b> | 0.31      | 0.42  | 0.30  | 0.22  | 0.16  | 0.63  | 0.29      | 0.41  | 0.30  | 0.21  | 0.1639 | 0.64  | 0.29      | 0.32  | 0.22  | 0.15  | 0.11  | 0.36  |
